# Supplementary material for: Construction of coordination networks with high connectivity: a new 8-connected self-penetrating network based on tetranuclear metal clusters
Source: Royal Society of Chemistry journal article supplement (doi:10.1039/b807195k), 2008-01-01

Electronic Supplementary Material for CrystEngComm  
This journal is © The Royal Society of Chemistry 2008

## **Construction of coordination networks with high connectivity: a new 8-connected self-penetrating network based on tetranuclear metal clusters**

**Zhi-Gang Li,<sup>a,b</sup> Guan-Hua Wang,<sup>a,b</sup> Heng-Qing Jia,<sup>a</sup> Ning-Hai Hu,<sup>\*a</sup> Jing-Wei Xu<sup>\*a</sup> and Stuart R. Batten<sup>c</sup>**

<sup>a</sup>*Changchun Institute of Applied Chemistry, Chinese Academy of Sciences, Changchun 130022, China. Fax: 86 431 85685653; Tel: 86 431 85262342; E-mail: [hunh@ciac.jl.cn](mailto:hunh@ciac.jl.cn)*

<sup>b</sup>*Graduate School, Chinese Academy of Sciences, Beijing, 100039, China.*

<sup>c</sup>*School of Chemistry, Monash University, Clayton, Victoria, 3800, Australia.*

### **Supplementary Information**

**Figure S1.** Various coordination modes of 2,5-pydc ligand summarized from Cambridge Structural Database.

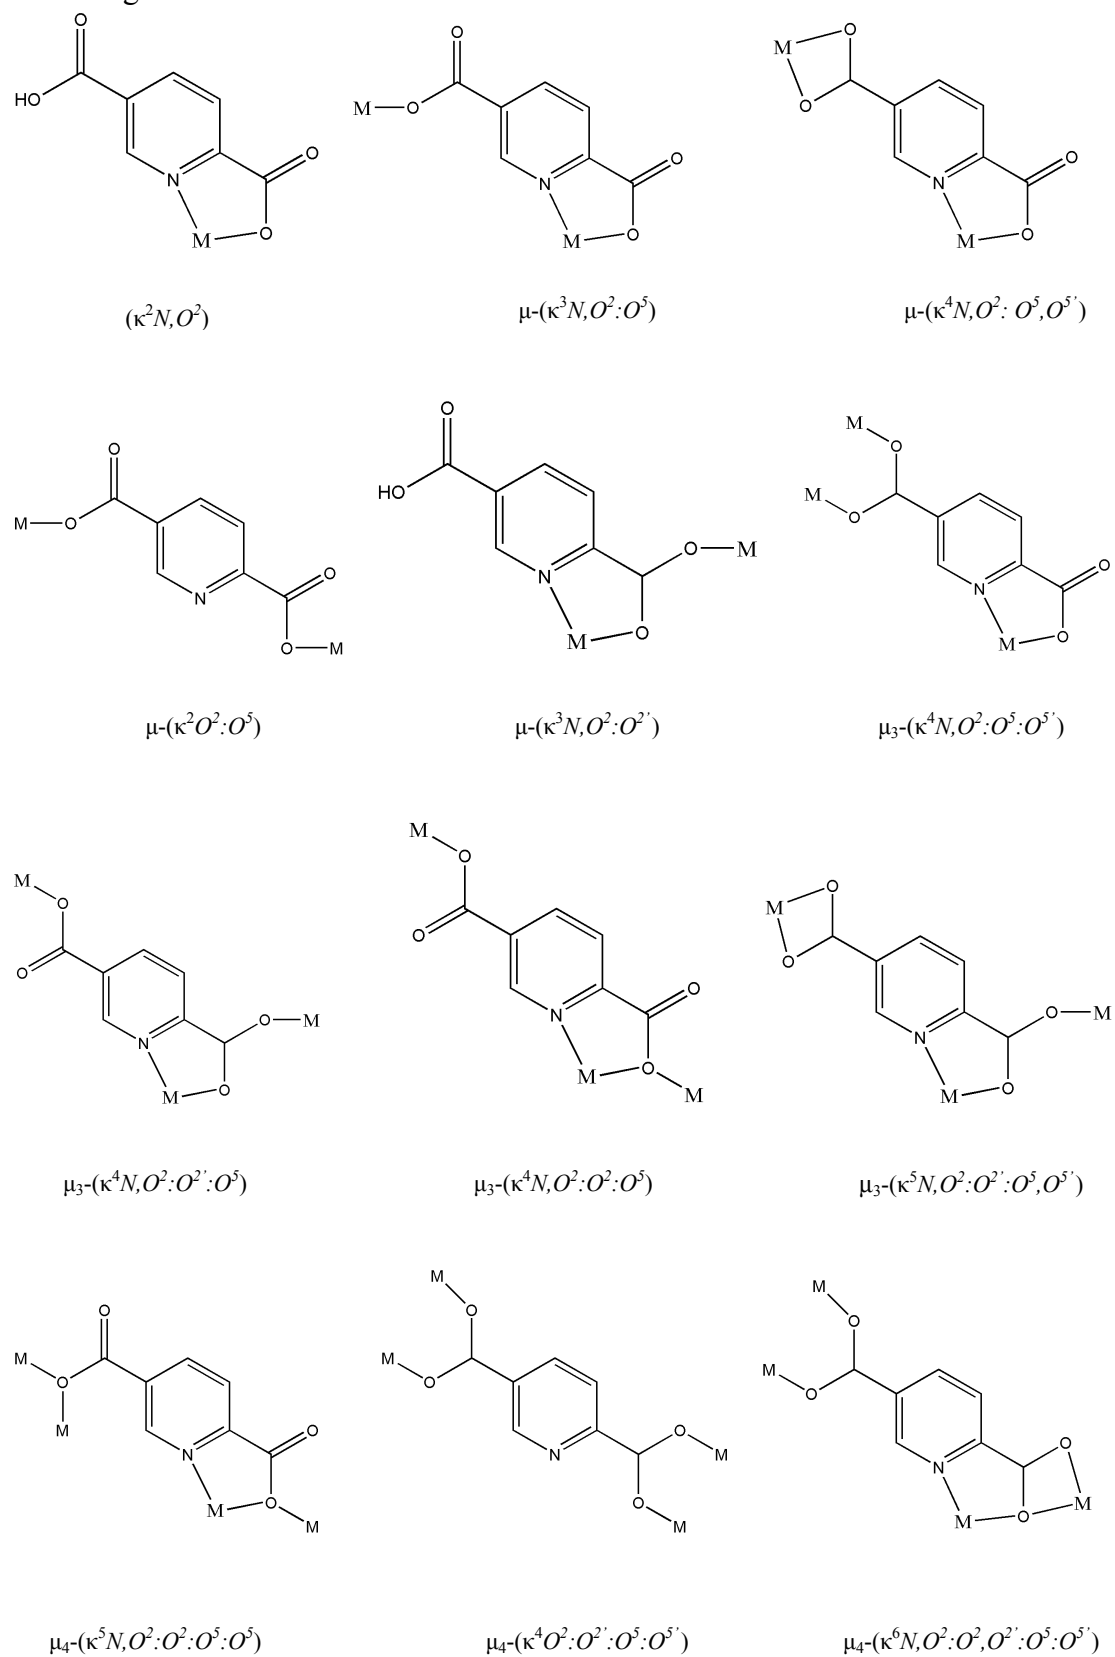

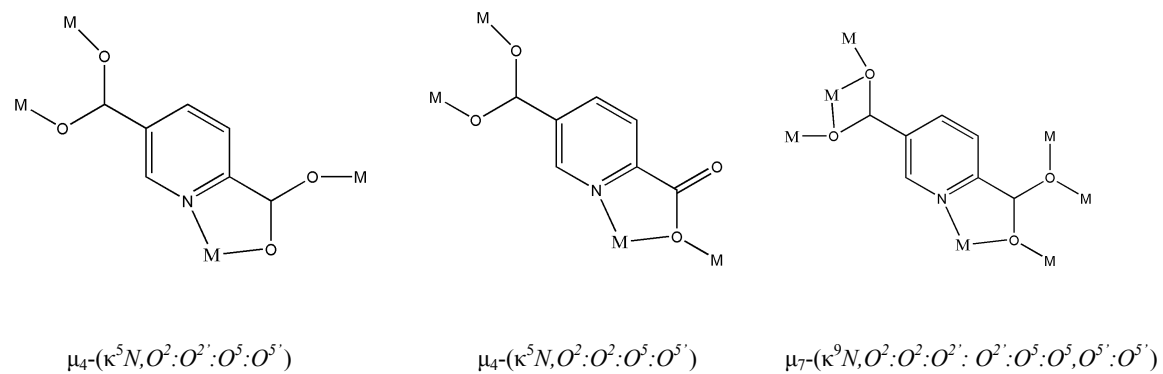

**Figure S2.** Thermal gravimetric curves of **1** and **2**.

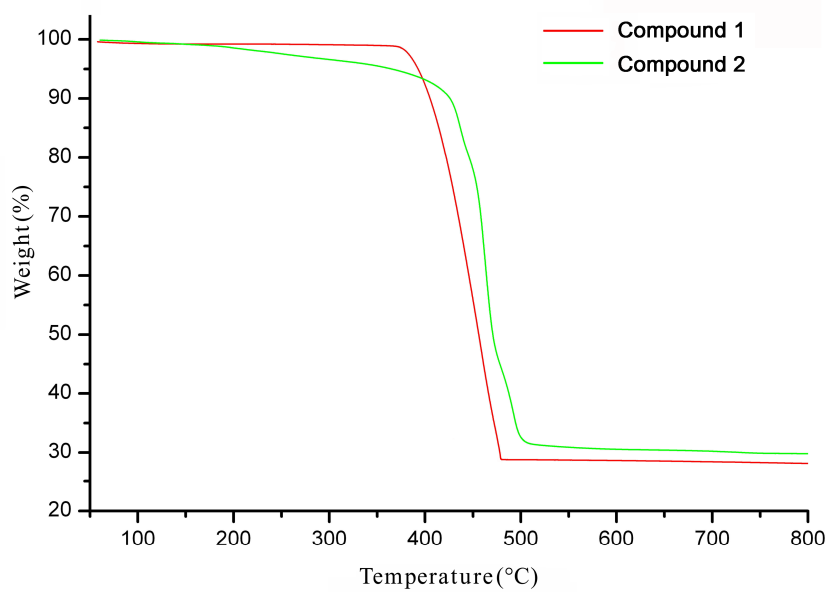

**Figure S3.** FT-IR spectroscopy of **1** (a) and **2** (b).

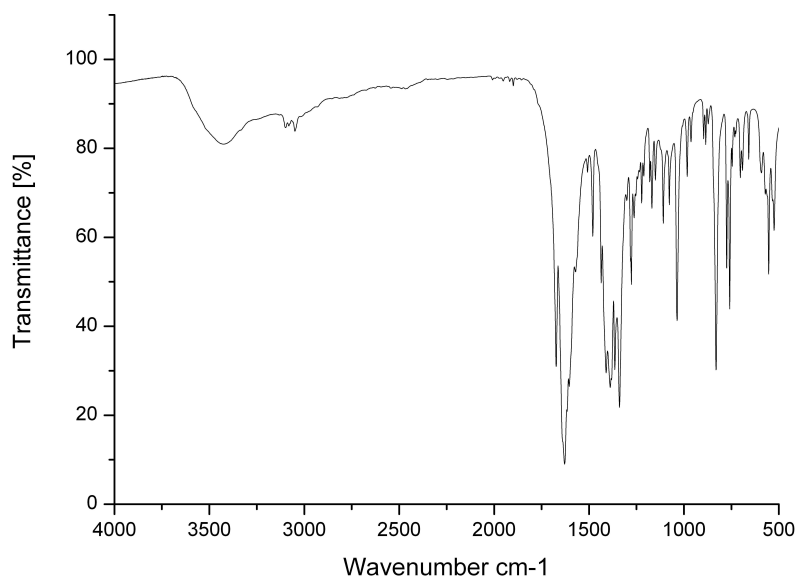

(a)

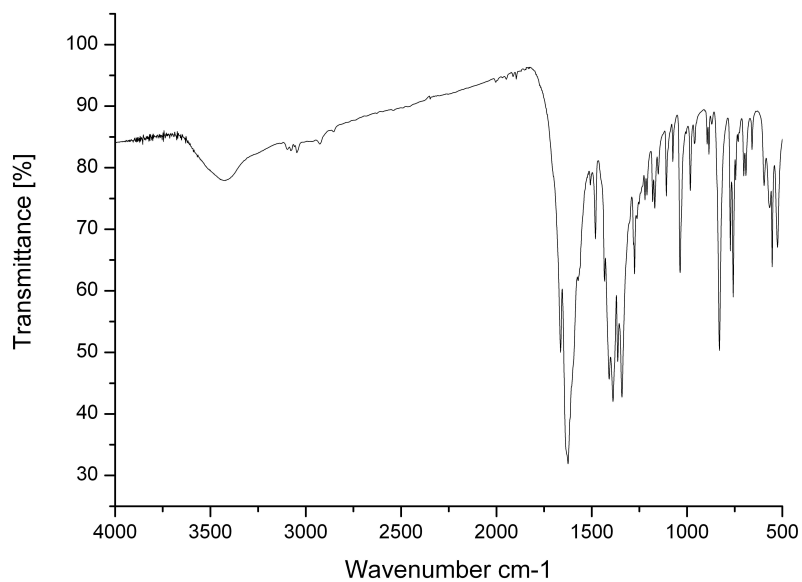

(b)

**Figure S4.** Structure of **2**, showing the coordination environments of the  $\text{Zn}^{2+}$  ions and the coordination modes of the 2,5-pydc ligands. Displacement ellipsoids are drawn at the 30% probability level. Symmetry codes: (a)  $x, 1-y, 0.5+z$ ; (b)  $-0.5+x, 0.5-y, -0.5+z$ ; (c)  $0.5-x, 0.5+y, 0.5-z$ ; (d)  $x, 1-y, -0.5+z$ ; (e)  $0.5-x, -0.5+y, 0.5-z$ ; (f)  $0.5+x, 0.5-y, 0.5+z$ .

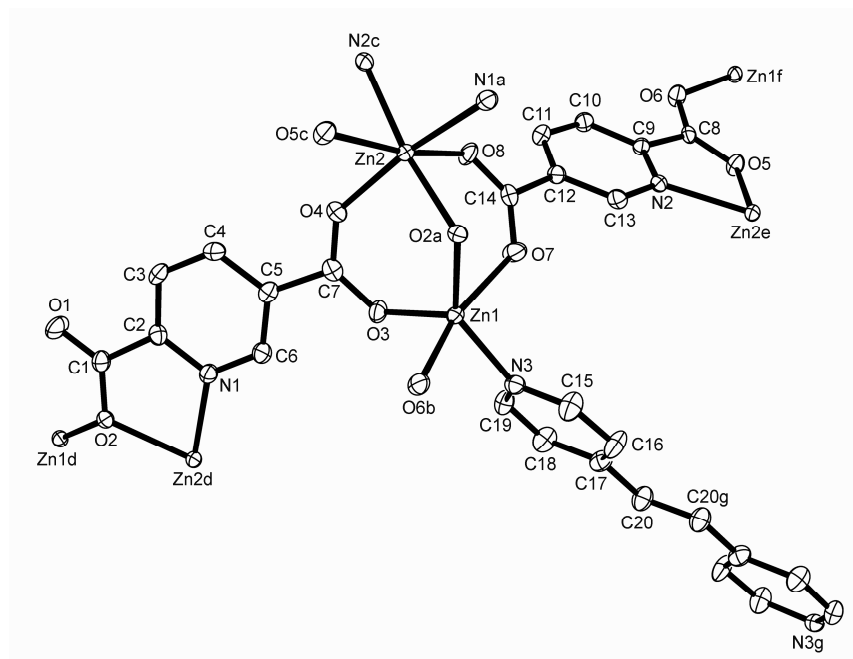

**Figure S5.** A view of the  $\text{Zn}_4$  clusters in **2**, showing the connection of a  $\text{Zn}_4$  core to eight neighbours. Symmetry code: (a)  $-x, 1-y, -z$ .

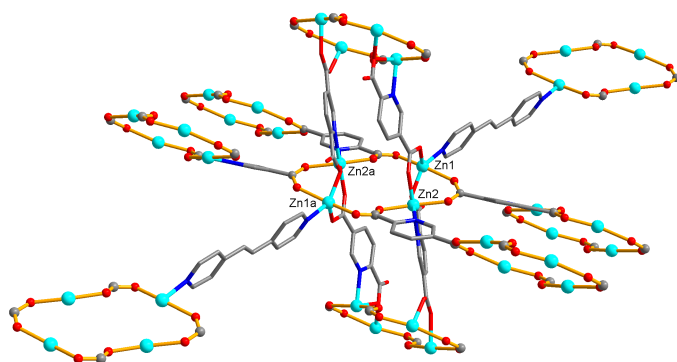

Supplement: b807195k.pdf [file b807195k.pdf]
